# Supplementary material for: Biofortified tomatoes provide a new route to vitamin D sufficiency
Source: PubMed Central journal article supplement (PMC9213236; doi:10.1038/s41477-022-01154-6), 2022-05-23
Supplement: 41477_2022_1154_MOESM1_ESM.pdf [file 41477_2022_1154_MOESM1_ESM.pdf]

**Supplementary information**

---

**Biofortified tomatoes provide a new route to vitamin D sufficiency**

---

In the format provided by the authors and unedited

| Geographical area              | Prevalence (%)                    |                     |
|--------------------------------|-----------------------------------|---------------------|
|                                | Cutoff of <25nmol/L or <30 nmol/L | Cutoff of <50nmol/L |
| Global <sup>31</sup>           | 6.7%                              | 37.3%               |
| US <sup>32</sup>               | 5.9%                              | 24.0%               |
| Canada <sup>33</sup>           | 7.4%                              | 36.8%               |
| Europe <sup>34</sup>           | 13.0%                             | 40.4%               |
| Afghanistan <sup>35</sup>      | 64.7%*<br>(<20nmol/L)             | 95.5%*              |
| China (Mainland) <sup>36</sup> | 20.7%                             | 63.2%               |
| Japan <sup>37</sup>            | NA                                | 53.6%               |
| India <sup>38,39</sup>         | 19.4-87%                          | 67.0%               |
| Iran and Jordan <sup>40</sup>  | 50.0%                             | 90.0%               |
| Africa <sup>41</sup>           | 18.5%                             | 34.2%               |
| Syria <sup>42</sup>            | 61.0%                             | 90.1%               |

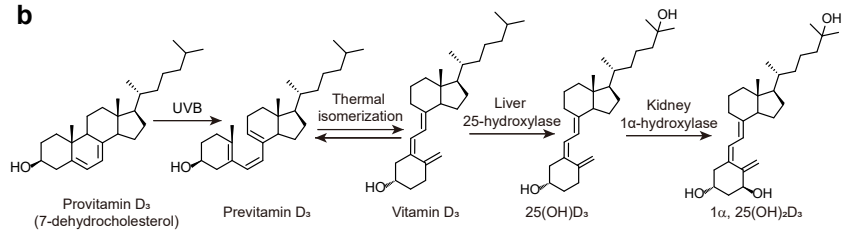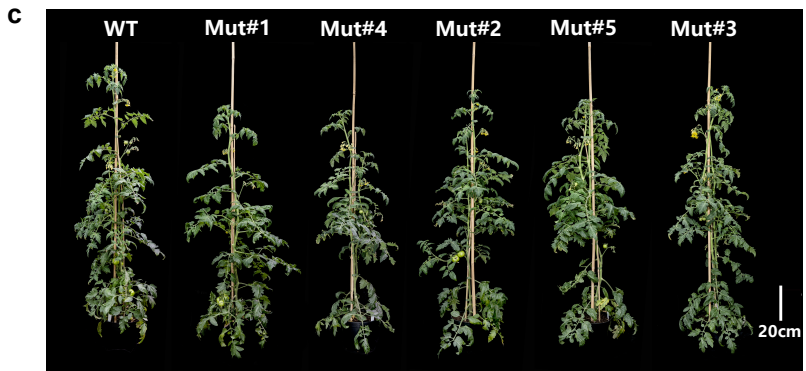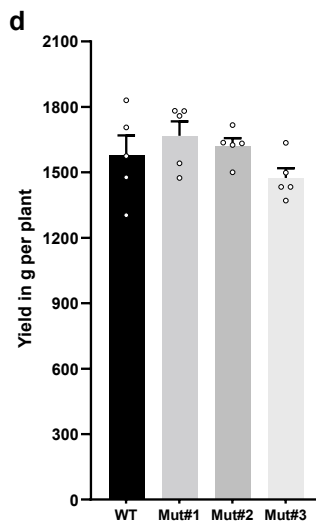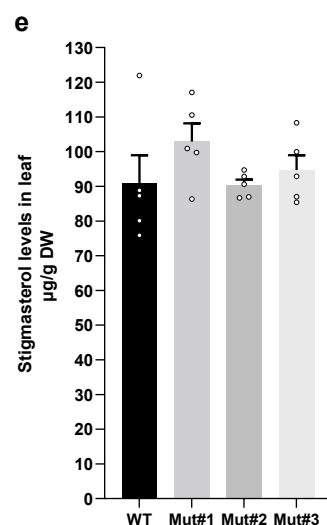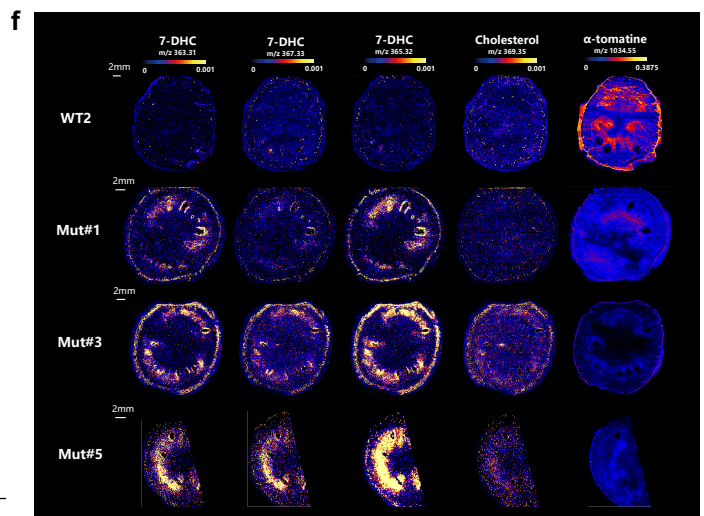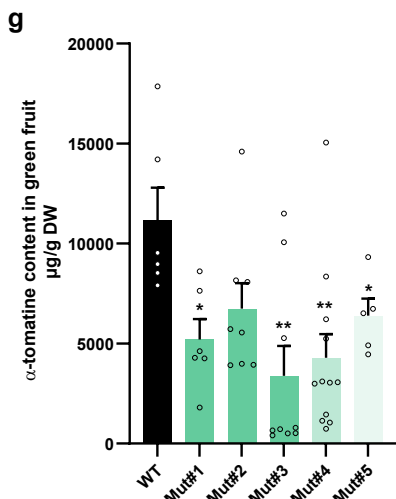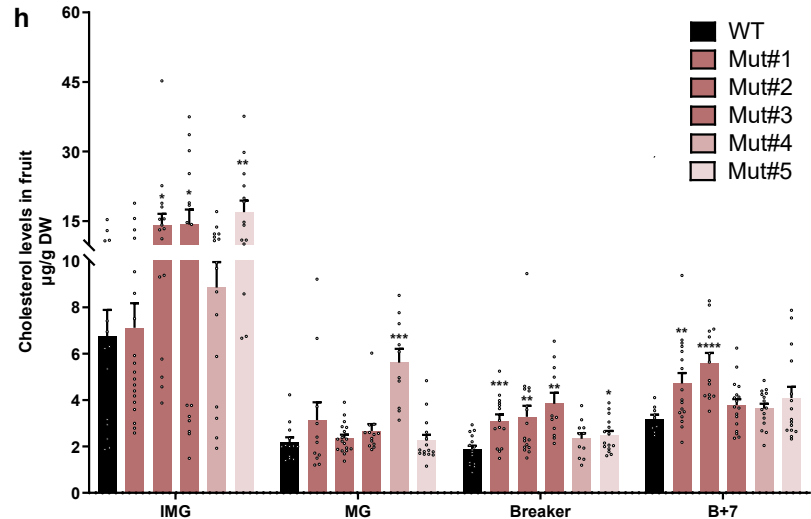

**Supplementary Figure 1 a.** Vitamin D deficiency by geographical area. Cutoffs refer to serum concentrations of 25(OH)D used to define vitamin D deficiency. 25(OH)D=25-hydroxyvitamin D. Serum concentrations of 25(OH)D lower than 25 (or 30) nmol/L and 50 nmol/L are usually regarded as vitamin D deficiency and insufficiency, respectively. \* Percentage for women of reproductive age; NA, data not available. **b.** Synthesis and activation of vitamin D<sub>3</sub> in human. Figure adapted from Jäpelt *et al.* (ref<sup>10</sup>). **c.** Adult plants of wild type and *S17-DR2* mutants. Scale bar, 20 cm. **d.** Yield of WT and *S17-DR2* mutant plants in g per plant (mean  $\pm$  s.e.m, n=5 plants per line). Statistical significance between WT and mutants was assessed using two-tailed t-tests. No significant differences were detected. **e.** Stigmasterol content of leaves from wild-type and *S17-DR2* knock-out lines (mean  $\pm$  s.e.m, n=5 biologically independent leaf samples per line). Statistical significance between WT and mutants was assessed using two-tailed t-tests. No significant differences were detected. **f.** MALDI images of 7-DHC (*m/z* 367.33) and its laser-induced derivative ions (*m/z* 365.32, *m/z* 363.31), cholesterol (*m/z* 369.35) and  $\alpha$ -tomatine (*m/z* 1034.55). Scale bar, 2 mm. The HotMetal2 colour scale indicates the range of total ion current (TIC) -normalised intensity. The same metabolite is shown with identical scale intensity for wild type and mutant samples. More details can be found in the online methods. **g.**  $\alpha$ -tomatine content of immature green fruit of wild-type and *S17-DR2* knock-out lines (mean  $\pm$  s.e.m, n=6, 6, 8, 9, 12 and 5 biologically independent fruit samples). Statistical significance between WT and mutants was assessed using two-tailed t-tests (\* $P \leq 0.05$ , \*\* $P \leq 0.01$ ). **h.** Cholesterol content of wild-type (WT) and *S17-DR2* knock-out tomato fruit during fruit ripening (IMG, immature green; MG, mature green; Breaker: fruit turning ripe; B+7, seven days after breaker: 'ripe fruit') (mean  $\pm$  s.e.m). From left to right, n = 14, 19, 16, 15, 16, 14, 13, 11, 18, 13, 10, 15, 15, 14, 17, 11, 11, 15, 9, 17, 14, 17, 15, and 15 biologically independent fruit samples. Statistical significance between WT and mutants at each stage was assessed using two-tailed t-tests (\* $P \leq 0.05$ ; \*\* $P \leq 0.01$ ; \*\*\* $P \leq 0.001$ ; \*\*\*\* $P \leq 0.0001$ ). See source data for *P* values where relevant.



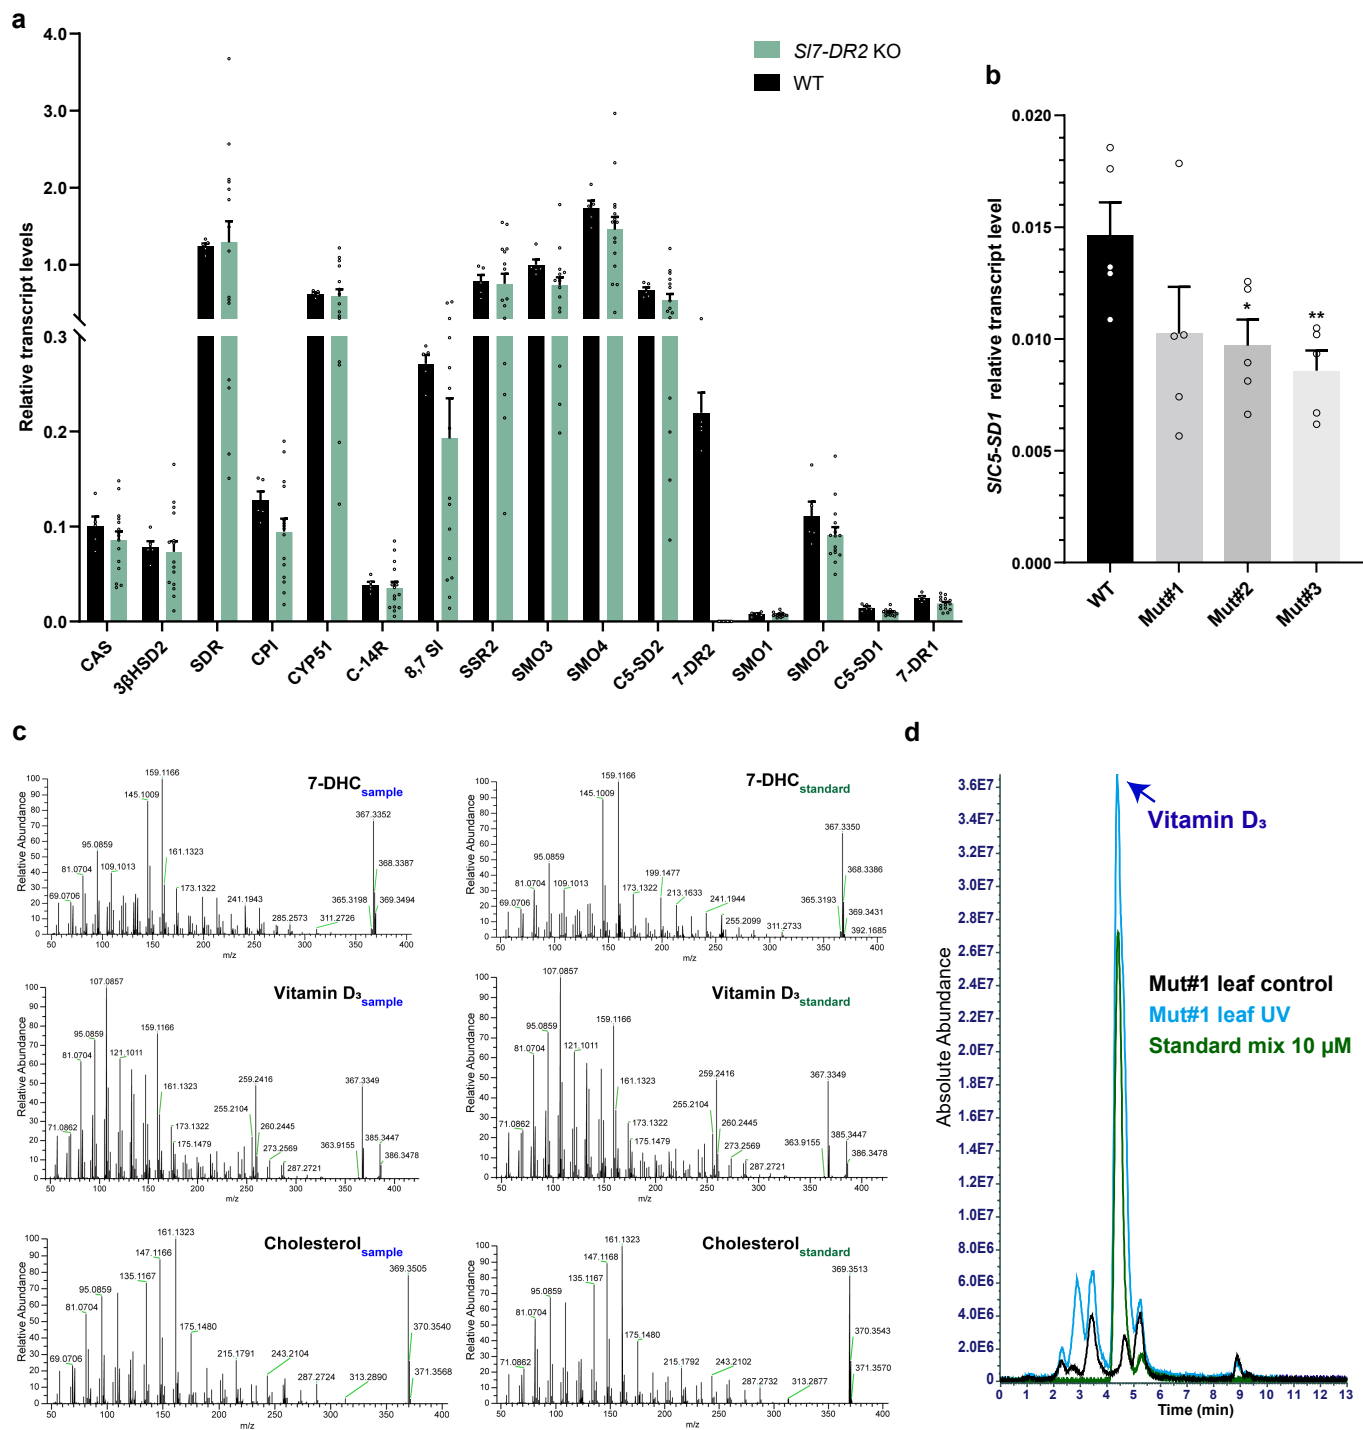

**Supplementary Figure 2 a.** Relative expression levels of genes in the cholesterol and phytosterol biosynthetic pathways in leaves of wild type and *S17-DR2* mutants (mean  $\pm$  s.e.m). *SIActin* was used as an internal standard. WT, n=5; *S17-DR2* KO, n=15 (a combination of 5 samples each from Mut#1, Mut#2 and Mut#3, which carry the same mutation in *S17-DR2*). **b.** Relative expression levels of *SIC5-SD1* in leaves of wild type and *S17-DR2* mutants. *SIActin* was used as an internal standard (mean  $\pm$  s.e.m, n=5 biologically independent leaf samples for each line). Statistical significance between WT and mutants was assessed using two-tailed t-tests (\* $P \leq 0.05$ , \*\* $P \leq 0.01$ ). See source data for  $P$  values where relevant. **c.** Representative LC-MS spectra of 7-DHC, vitamin D<sub>3</sub> and cholesterol from analysed samples and corresponding authentic standards. **d.** Overlaid chromatograms of extracts from Mut#1 leaf tissues with and without 1h UV irradiation (shown in light blue and black, respectively), as well as standard mix (10  $\mu$ M of 7-DHC, vitamin D<sub>3</sub> and cholesterol),  $m/z$ = 385.3442-385.3480. Vitamin D<sub>3</sub> was present primarily in the UV irradiated sample.

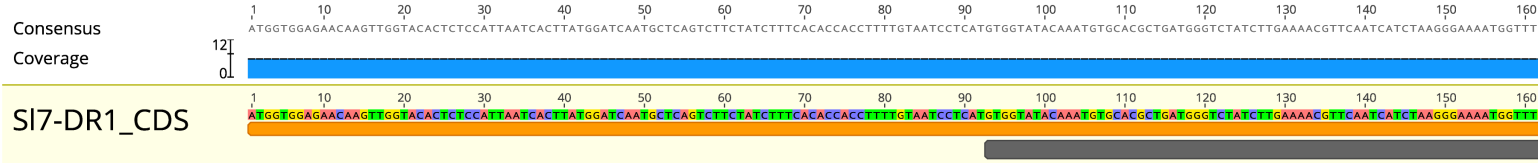

WT\_SI7-DR1\_CDS\_F

WT\_SI7-DR1\_CDS\_R

Mut#1\_SI7-DR 1\_CDS\_F

Mut#1\_SI7-DR 1\_CDS\_R

Mut#2\_SI7-DR1\_CDS\_F

Mut#2\_SI7-DR1\_CDS\_R

Mut#3\_SI7-DR1\_CDS\_F

Mut#3\_SI7-DR1\_CDS\_R

Mut#4\_SI7-DR 1\_CDS\_F

Mut#4\_SI7-DR 1\_CDS\_R

Mut#5\_SI7-DR 1\_CDS\_F

Mut#5\_SI7-DR 1\_CDS\_R

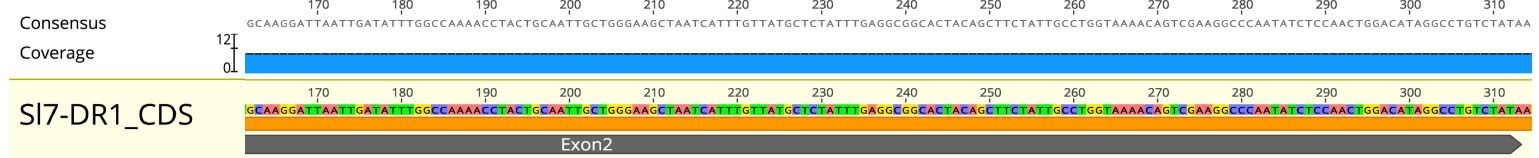

WT\_SI7-DR1\_CDS\_F

WT\_SI7-DR1\_CDS\_R

Mut#1\_SI7-DR 1\_CDS\_F

Mut#1\_SI7-DR 1\_CDS\_R

Mut#2\_SI7-DR1\_CDS\_F

Mut#2\_SI7-DR1\_CDS\_R

Mut#3\_SI7-DR1\_CDS\_F

Mut#3\_SI7-DR1\_CDS\_R

Mut#4\_SI7-DR 1\_CDS\_F

Mut#4\_SI7-DR 1\_CDS\_R

Mut#5\_SI7-DR 1\_CDS\_F

Mut#5\_SI7-DR 1\_CDS\_R

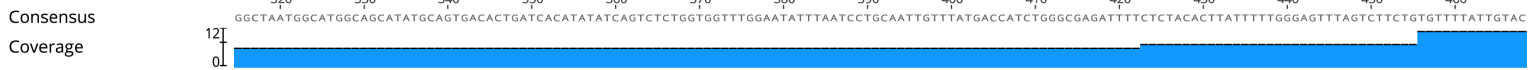

SI7-DR1\_CDS

GGCTAAATGGCATGGCAGCATATGCAGTGACACTGATCACATATATCAGTCTCTGGTGGTTGGAATATTTAACTCTGCAATTGTTTATGACCATCTGGGCGAGATTTCTCTACACTTATTTTGGGAGTTTAGTCTTCTGTGTTTATTGTAC

WT\_SI7-DR1\_CDS\_F

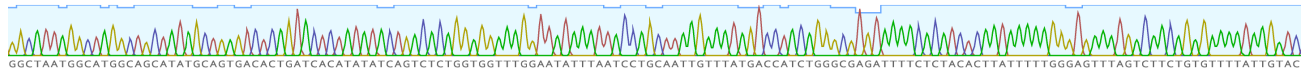

WT\_SI7-DR1\_CDS\_R

Mut#1\_SI7-DR 1\_CDS\_F

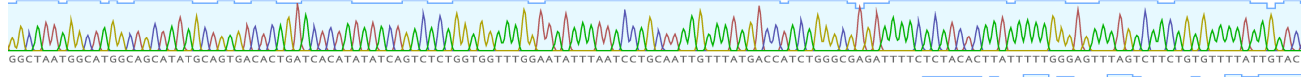

Mut#1\_SI7-DR 1\_CDS\_R

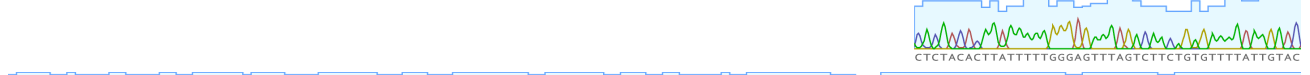

Mut#2\_SI7-DR1\_CDS\_F

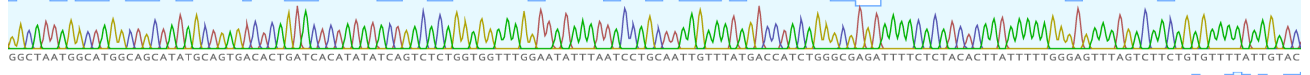

Mut#2\_SI7-DR1\_CDS\_R

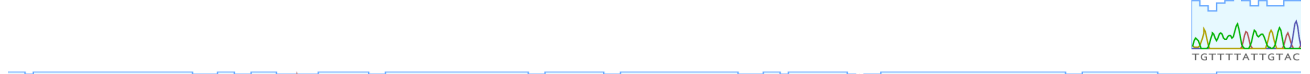

Mut#3\_SI7-DR1\_CDS\_F

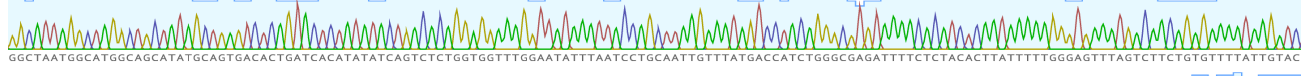

Mut#3\_SI7-DR1\_CDS\_R

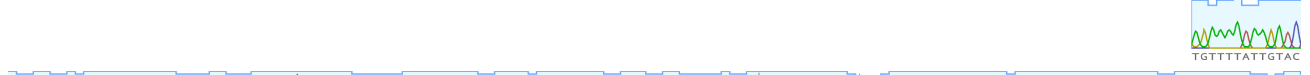

Mut#4\_SI7-DR 1\_CDS\_F

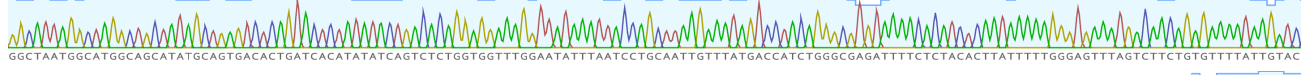

Mut#4\_SI7-DR 1\_CDS\_R

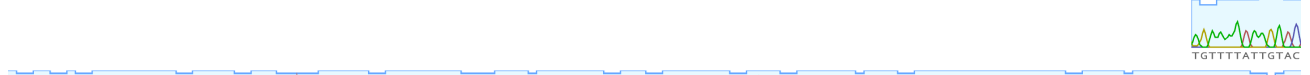

Mut#5\_SI7-DR 1\_CDS\_F

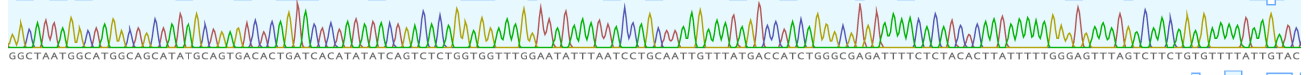

Mut#5\_SI7-DR 1\_CDS\_R

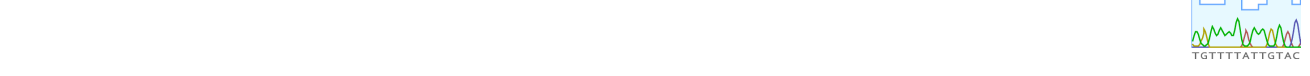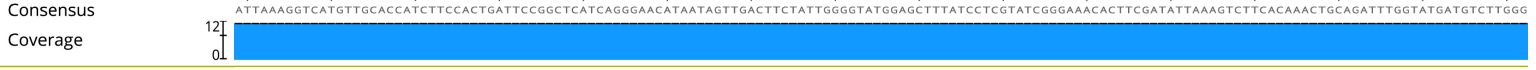

SI7-DR1\_CDS

ATTAAGGTCATGTTGCACCATCTCCACTGATCCGGCTCATCAGGGAACATAAATAGTTGACTTCTATTGGGGTATGGAGCTTATCCTCGTATCGGGAAACACTTCGATATTAAGTCTTCACAACTGCAGATTGGTATGATGCTTGGG

WT\_SI7-DR1\_CDS\_F

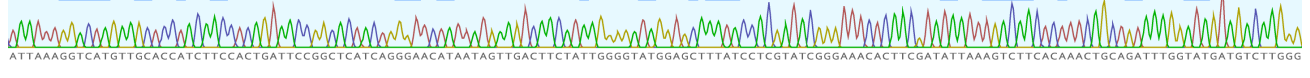

WT\_SI7-DR1\_CDS\_R

Mut#1\_SI7-DR 1\_CDS\_F

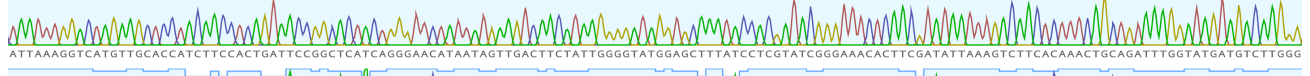

Mut#1\_SI7-DR 1\_CDS\_R

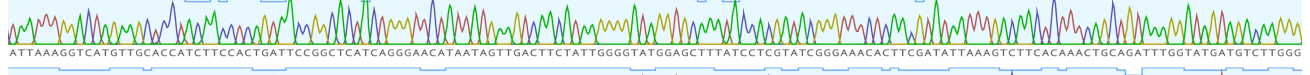

Mut#2\_SI7-DR1\_CDS\_F

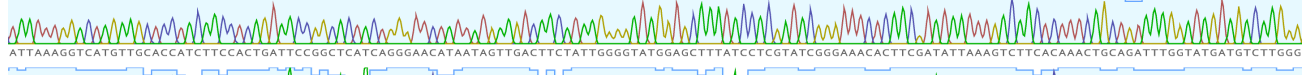

Mut#2\_SI7-DR1\_CDS\_R

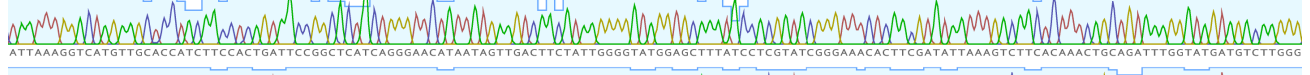

Mut#3\_SI7-DR1\_CDS\_F

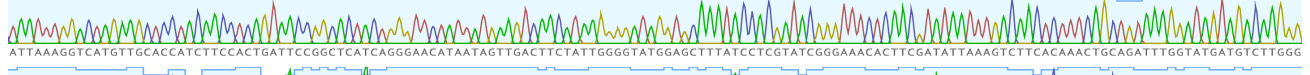

Mut#3\_SI7-DR1\_CDS\_R

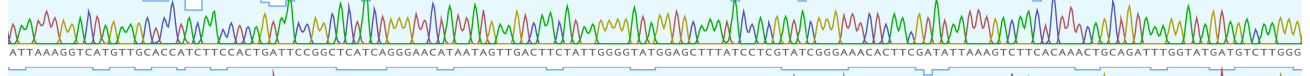

Mut#4\_SI7-DR 1\_CDS\_F

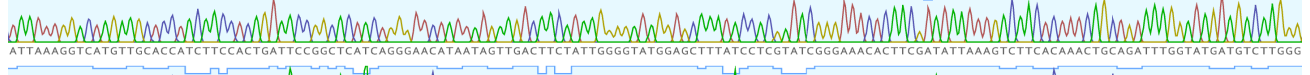

Mut#4\_SI7-DR 1\_CDS\_R

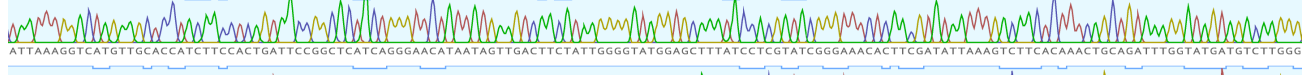

Mut#5\_SI7-DR 1\_CDS\_F

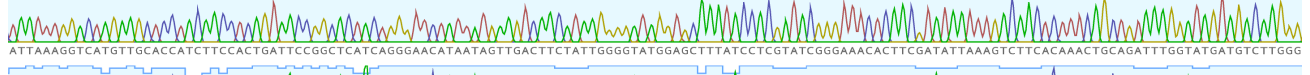

Mut#5\_SI7-DR 1\_CDS\_R

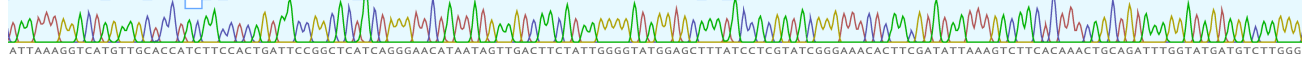



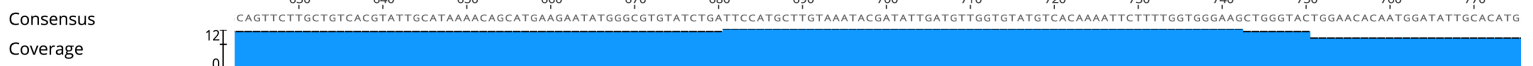

SI7-DR1\_CDS

CAGTTCCTTGCCTGTCACGTATTGCATAAAACAGCATGAAGAATATGGGCGTGATCTGATTCATGCTTGTAAATACGATATTGATGTTGGTGTATGTCACAAAATCTTTTGGTGGGAAGCTGGGTACTGGAACACAATGGATATTGCACATG

WT\_SI7-DR1\_CDS\_F

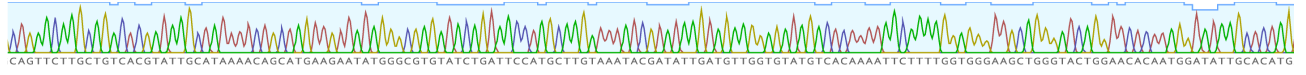

WT\_SI7-DR1\_CDS\_R

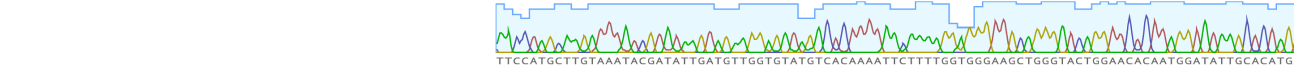

Mut#1\_SI7-DR1\_CDS\_F

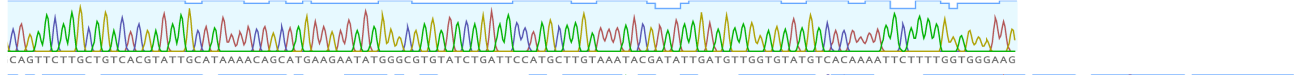

Mut#1\_SI7-DR1\_CDS\_R

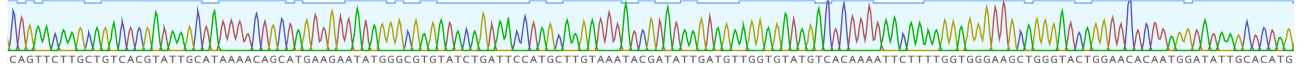

Mut#2\_SI7-DR1\_CDS\_F

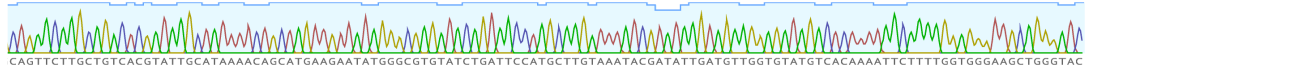

Mut#2\_SI7-DR1\_CDS\_R

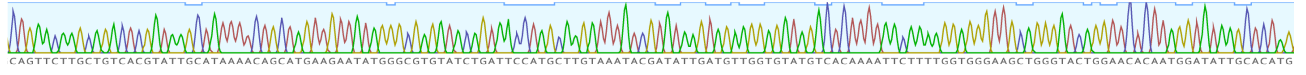

Mut#3\_SI7-DR1\_CDS\_F

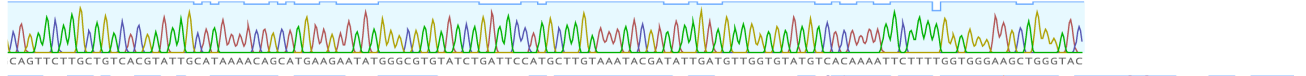

Mut#3\_SI7-DR1\_CDS\_R

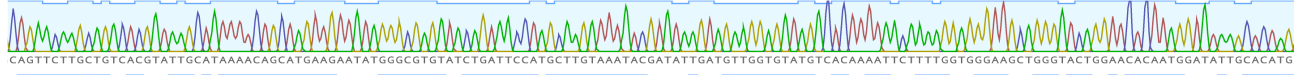

Mut#4\_SI7-DR1\_CDS\_F

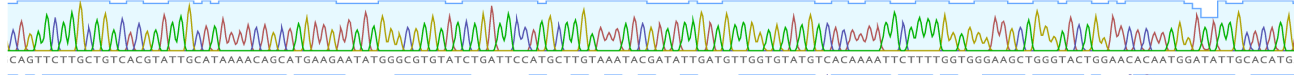

Mut#4\_SI7-DR1\_CDS\_R

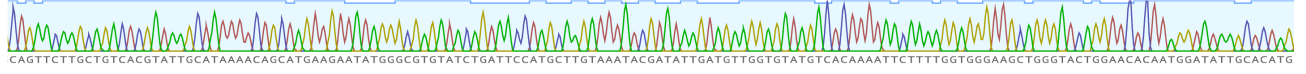

Mut#5\_SI7-DR1\_CDS\_F

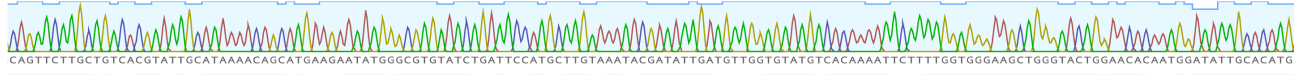

Mut#5\_SI7-DR1\_CDS\_R

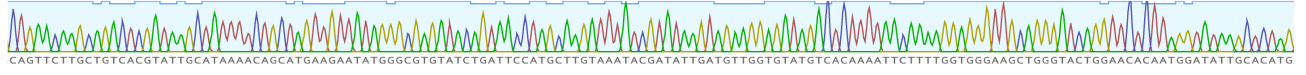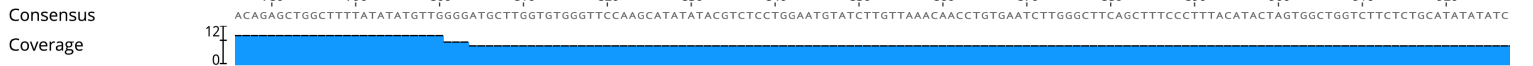

SI7-DR1\_CDS

ACAGAGCTGGCTTTTATATATGTTGGGGATGCTTGGTGTGGGTTCCAAGCATATACGTCTCCTGGAATGATCTTGTTAAACAACCTGTGAATCTTGGGCTTCAGCTTCCCTTACATACTAGTGGCTGGTCTTCTCTGCATATATATC

WT\_SI7-DR1\_CDS\_F

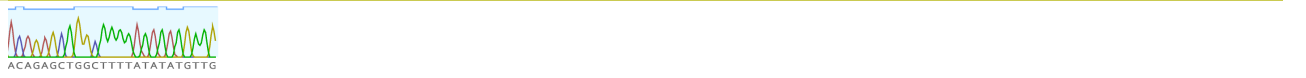

WT\_SI7-DR1\_CDS\_R

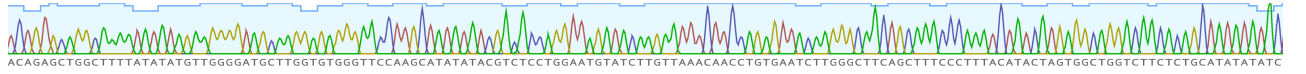

Mut#1\_SI7-DR1\_CDS\_F

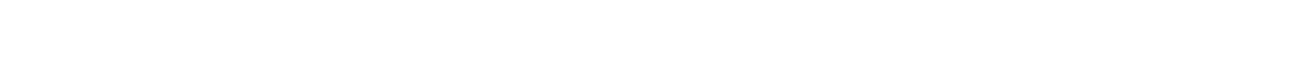

Mut#1\_SI7-DR1\_CDS\_R

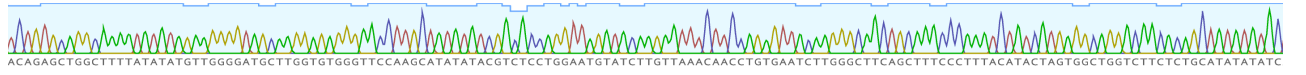

Mut#2\_SI7-DR1\_CDS\_F

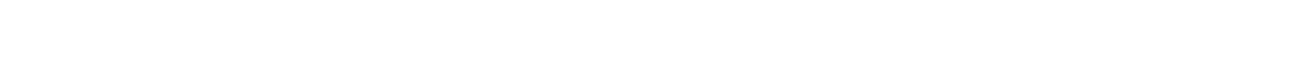

Mut#2\_SI7-DR1\_CDS\_R

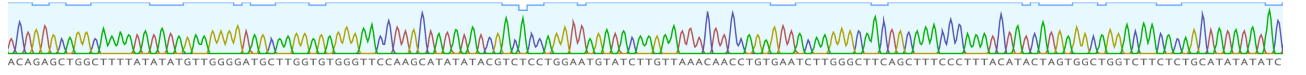

Mut#3\_SI7-DR1\_CDS\_F



Mut#3\_SI7-DR1\_CDS\_R

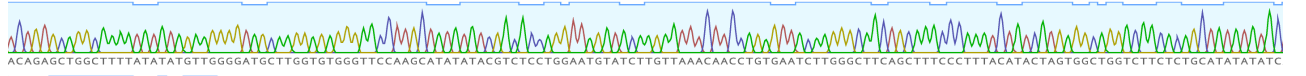

Mut#4\_SI7-DR1\_CDS\_F

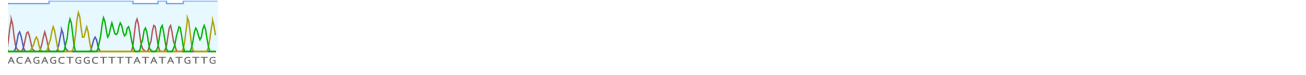

Mut#4\_SI7-DR1\_CDS\_R

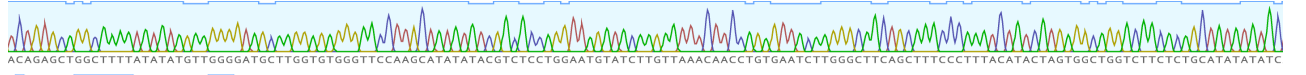

Mut#5\_SI7-DR1\_CDS\_F

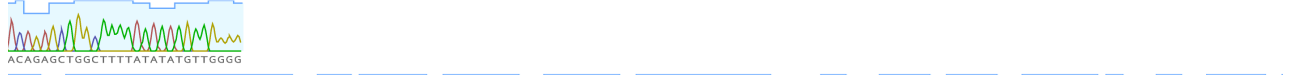

Mut#5\_SI7-DR1\_CDS\_R

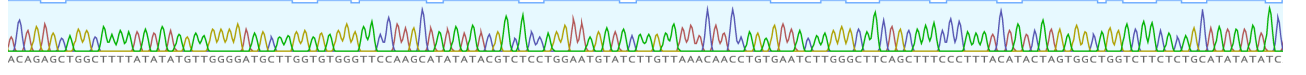

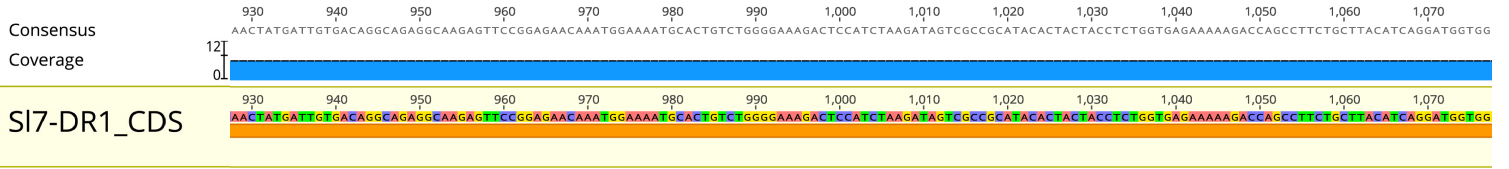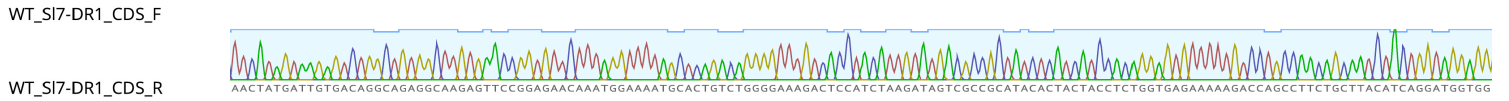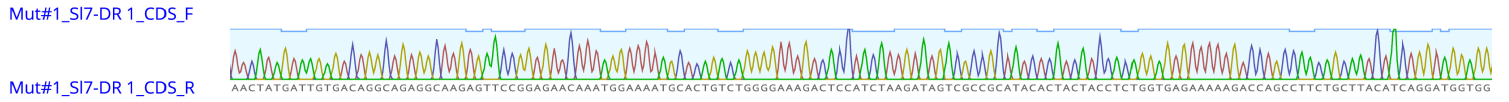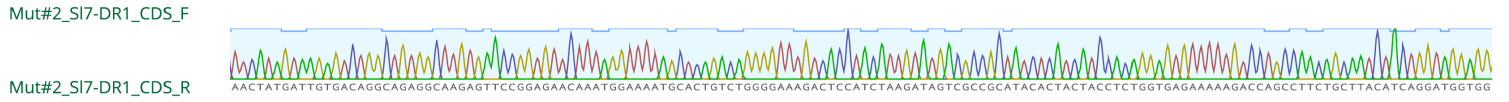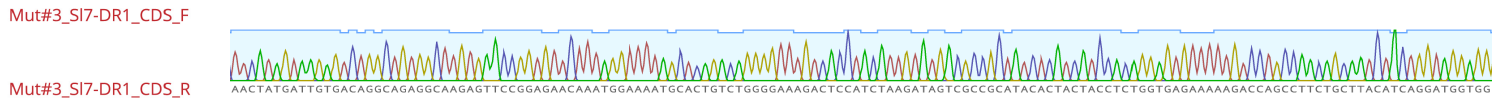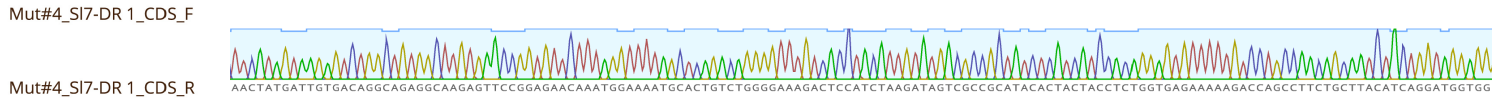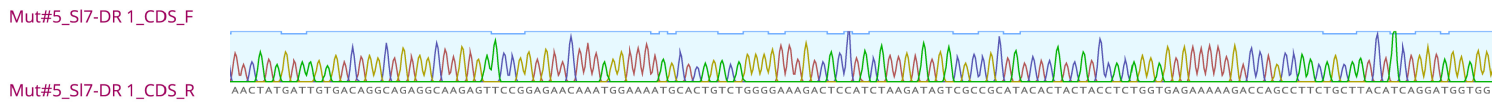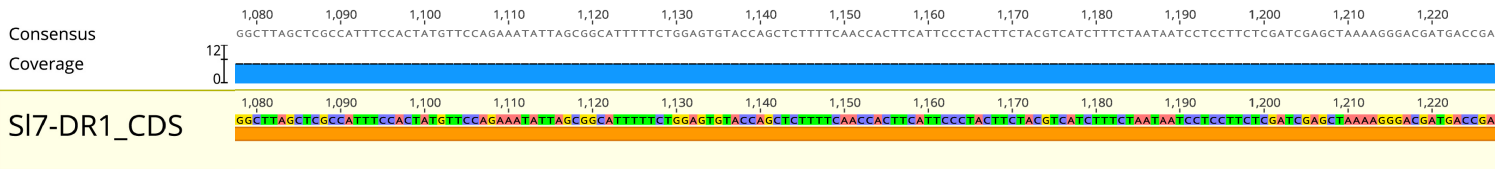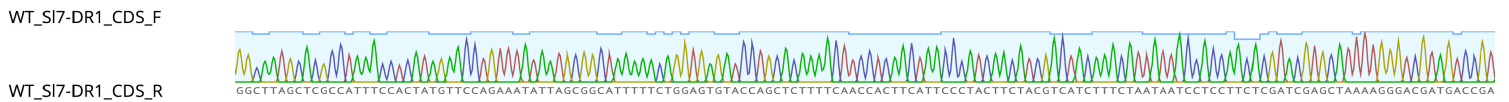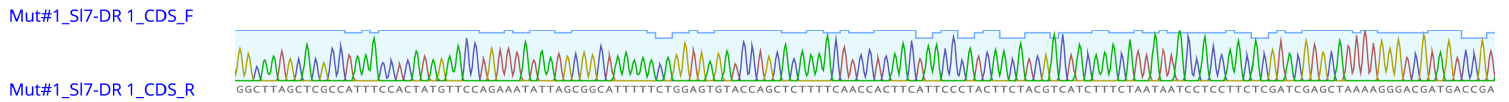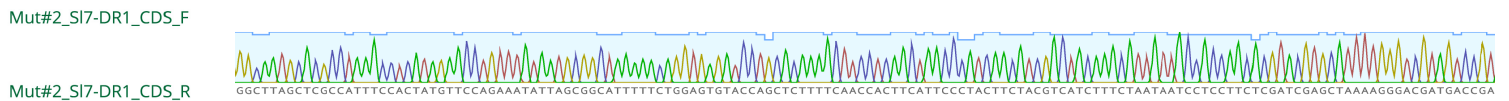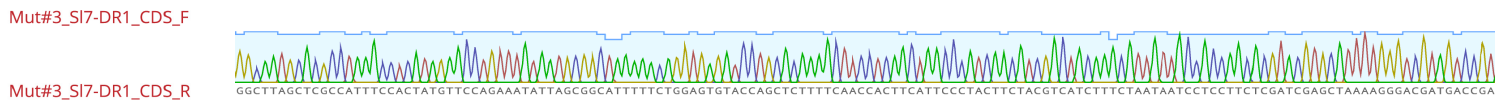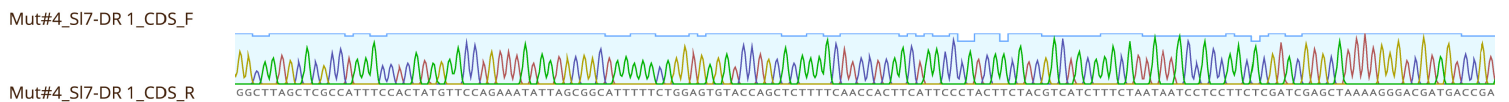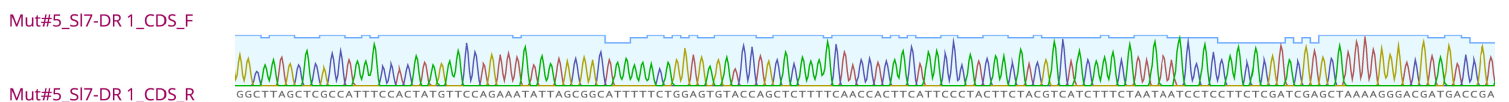

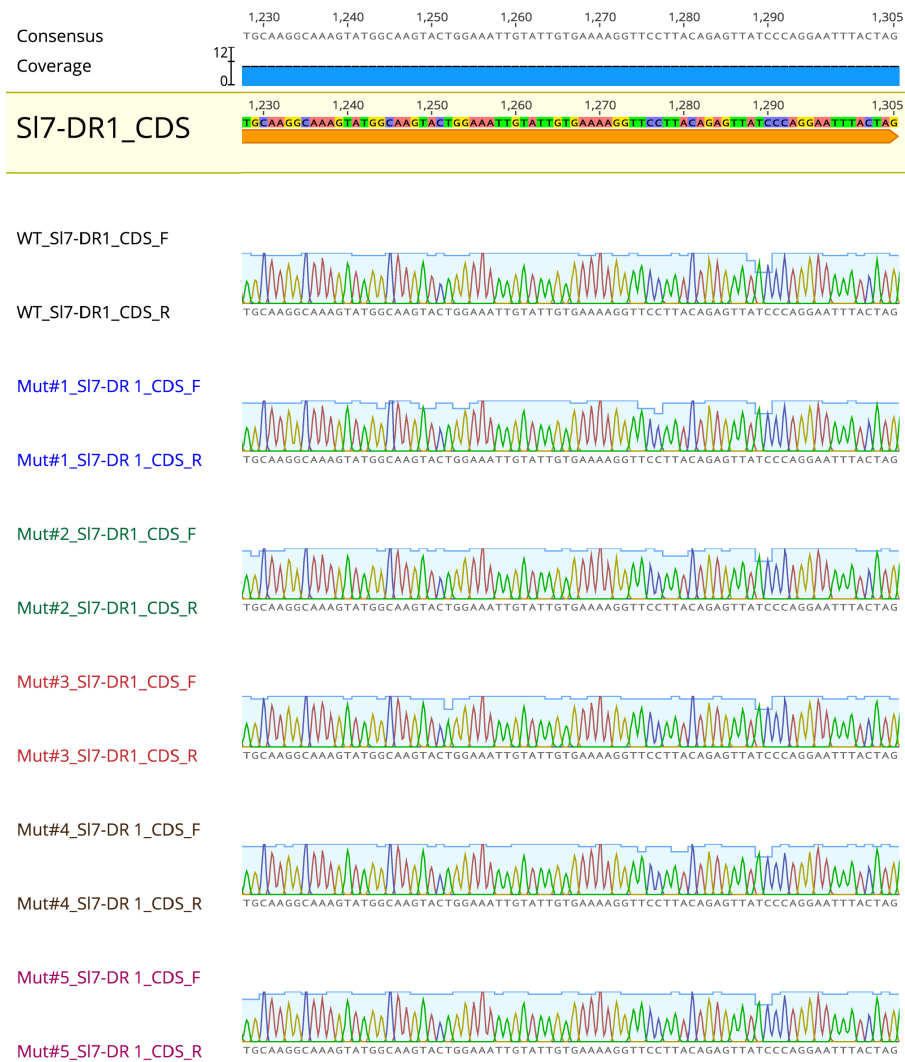

**Supplementary Figure 3** Sequencing results of coding sequences (CDS) of *SI7-DR1* amplified from cDNA of wildtype and five independent *SI7-DR2* knock-out lines. No mutations of *SI7-DR1* were detected in any of the mutants.

**Supplementary Table 1. Primers used in RT-qPCR.**

| <b>Gene</b>                                                   | <b>Oligo</b>       | <b>Sequence</b>           | <b>Product Size</b> |
|---------------------------------------------------------------|--------------------|---------------------------|---------------------|
| <i>SIActin</i> ( <i>Solyc03g078400</i> )                      | ACT-q_F            | GGGGGCTATGAATGCACGGT      | 110bp               |
|                                                               | ACT-q_R            | GGCAATGCATCAGGCACCTC      |                     |
| <i>SISSR2</i> ( <i>Solyc02g069490</i> )                       | SSR2_q_F1          | TGTCATTCAAGATCTCCTTGTTCT  | 87bp                |
|                                                               | SSR2_q_R1          | CAAATTGGATATACCTCCATCTCGC |                     |
| <i>SI7-DR1</i> ( <i>Solyc01g009310</i> )                      | 7-DR1_q_F1         | TTGGGCTTCAGCTTCCCTT       | 88bp                |
|                                                               | 7-DR1_q_R1         | AACTCTTGCTCTGCCTGTC       |                     |
| <i>SISMO4</i> ( <i>Solyc06g005750</i> )                       | SMO4_q_F1          | GTCCATCATGAGTACGCGACA     | 101bp               |
|                                                               | SMO4_q_R1          | ATTGCAGGACCAATGACCGT      |                     |
| <i>SISMO3</i> ( <i>Solyc01g091320</i> )                       | SMO3_q_F1          | TCACAGCGGGTATGAATTTCCA    | 106bp               |
|                                                               | SMO3_q_R           | ACTGTGACAACCTTCCCAACA     |                     |
| <i>SI3<math>\beta</math>HSD2</i><br>( <i>Solyc02g081730</i> ) | 3 $\beta$ HSD2_q_F | TAAAGGCCTGCTGACATGCT      | 102bp               |
|                                                               | 3 $\beta$ HSD2_q_R | GATTTTCCAGCCCTTGCAGC      |                     |
| <i>SISDR</i> ( <i>Solyc01g073640</i> )                        | SDR_q_F            | GCACGCGGCTAAAGTTATGG      | 85bp                |
|                                                               | SDR_q_R            | GGCCCCAGCTAAAATCCCTT      |                     |
| <i>SIC5-SD2</i> ( <i>Solyc02g086180</i> )                     | C5-SD2_q_F         | GGAAGCCTTATGGACGGCTA      | 80bp                |
|                                                               | C5-SD2_q_R         | TGGTATGATAACCGGCACCC      |                     |
| <i>SICPI</i> ( <i>Solyc12g098640</i> )                        | CPI_q_F            | CCCTAGCAAGAGATGGGGTG      | 82bp                |
|                                                               | CP1_q_R            | TGGGACCACAATACCAAGGC      |                     |
| <i>SICYP51</i> ( <i>Solyc01g008110</i> )                      | CYP51_q_F          | CGTACAGGCAAGGCAGAGAA      | 85bp                |
|                                                               | CYP51_q_R          | TCTCACCTCTGTTGTTGGC       |                     |
| <i>SISMO1</i> ( <i>Solyc08g079570</i> )                       | SMO1_q_F           | GGCCAAAGCCAGAGCAATTT      | 111bp               |
|                                                               | SMO1_q_R           | AGCACCTTTAACTGCTGGA       |                     |
| <i>SISMO2</i> ( <i>Solyc06g076410</i> )                       | SMO2_q_F           | AGAAAGGGCAGGATGGTTGAG     | 94bp                |
|                                                               | SMO2_q_R           | ATACAGCAACAGGCGAGTGA      |                     |
| <i>SI8,7 SI</i> ( <i>Solyc06g082980</i> )                     | 8,7 SI_q_F         | TTGCCTGGTTTTGTTCCCT       | 83bp                |
|                                                               | 8,7 SI_q_R         | AACACCACAACCAGTACGGA      |                     |
| <i>SI7-DR2</i> ( <i>Solyc06g074090</i> )                      | 7-DR2_q_F          | GAGAATGGCCTGCAAGGACTA     | 111bp               |
|                                                               | 7-DR2_q_R          | AGGCAACAAAAGCTGAAGTGT     |                     |
| <i>SIC14-R</i> ( <i>Solyc09g009040</i> )                      | C-14R_q_F          | CGGTGTTTCAGAGGAGCCAAT     | 106bp               |
|                                                               | C-14R_q_R          | GAAGCAAGCAACTTTCCCCC      |                     |
| <i>SICAS</i> ( <i>Solyc04g070980</i> )                        | CAS_q_F            | GTATTGCTAAAGCTGCCGCC      | 86bp                |
|                                                               | CAS_q_R            | GGTGAAGCAAAGCTGCCAAG      |                     |
| <i>SIC5-SD1</i> ( <i>Solyc02g063240</i> )                     | C5-SD1_q_F         | ACTCTCCCCATTTGCTGGTT      | 106bp               |
|                                                               | C5-SD1_q_R         | GTGTGTGGTGAATGCACAGG      |                     |



**Supplementary Table 2. Detailed information for the identification of cholecalciferol (vitamin D<sub>3</sub>), 7-DHC and cholesterol by MALDI.**

| Standards spotted side by side on WT tissue section |                      |                        |                  | Standards spotted on glass slides separately |           |         |           |           |         |           |           |         | m/z Observed in mutants with same typical localisation pattern |         |           |         |
|-----------------------------------------------------|----------------------|------------------------|------------------|----------------------------------------------|-----------|---------|-----------|-----------|---------|-----------|-----------|---------|----------------------------------------------------------------|---------|-----------|---------|
| m/z                                                 | normalised intensity | drift time (dt) (bins) | colocalised with | cholcal                                      |           |         | 7dh       |           |         | chol      |           |         | Mut#1                                                          |         | Mut#5     |         |
|                                                     |                      |                        |                  | m/z                                          | intensity | dt bins | m/z       | intensity | dt bins | m/z       | intensity | dt bins | m/z                                                            | dt bins | m/z       | dt bins |
| 360.3638                                            | 0.06069              | 12.30                  | 7dh and chol     | 360.3530                                     | 1708      | 12.27   |           |           |         | 360.3619  | 607       | 12.26   |                                                                |         |           |         |
| 361.3667                                            | 0.01652              | 12.28                  |                  |                                              |           |         | 361.2889  | 2285      | 10.88   |           |           |         |                                                                |         |           |         |
| *363.3063                                           | 0.06303              | 11.00                  | 7dh              | *363.305                                     | 682       | 10.97   | *363.3047 | 17699     | 10.92   |           |           |         | *363.3043                                                      | 10.93   | *363.3058 | 11.03   |
|                                                     |                      |                        |                  |                                              |           |         | 364.3088  | 6183      | 10.95   |           |           |         |                                                                |         |           |         |
| *365.321                                            | 0.0324               | 10.99                  | 7dh              | *365.3204                                    | 4144      | 11.08   | *365.3192 | 15508     | 10.92   |           |           |         | *365.319                                                       | 10.93   | *365.3182 | 11.01   |
| 366.3024                                            | 0.0083               | 11.25                  | 7dh              | 366.3253                                     | 1884      | 11.24   | 366.3237  | 6149      | 11.01   |           |           |         |                                                                |         |           |         |
|                                                     |                      |                        |                  | *367.3357                                    | 11782     | 11.23   | *367.3301 | 7997      | 11.14   | *367.3384 | 1366      | 11.22   | *367.3336                                                      | 11.27   | *367.3242 | 11.43   |
|                                                     |                      |                        |                  | 368.3391                                     | 3171      | 11.24   | 368.3340  | 2587      | 11.18   | 368.3438  | 1037      | 11.39   |                                                                |         |           |         |
| #369.3471                                           | 0.2623               | 11.74                  | chol             | #369.3192                                    | 1713      | 11.39   | #369.3162 | 4587      | 11.04   | #369.3546 | 14248     | 11.54   | #369.3381                                                      | 11.78   | #369.3350 | 11.82   |
| 370.2974                                            | 0.01066              | 11.27                  | 7dh and chol     |                                              |           |         |           |           |         | 370.3576  | 3924      | 11.55   |                                                                |         |           |         |
|                                                     |                      |                        |                  |                                              |           |         | 373.3100  | 1862      | 10.91   |           |           |         |                                                                |         |           |         |
| ^376.3227                                           | 0.02078              | 11.56                  | cholcal          |                                              |           |         |           |           |         |           |           |         |                                                                |         |           |         |
| ^377.3254                                           | 0.01356              | 11.55                  | cholcal          |                                              |           |         |           |           |         |           |           |         |                                                                |         |           |         |
|                                                     |                      |                        |                  |                                              |           |         | 379.2997  | 6491      | 11.20   |           |           |         |                                                                |         |           |         |
| 380.3334                                            | 0.25962              | 10.42                  |                  |                                              |           |         | 380.3202  | 5738      | 11.33   |           |           |         |                                                                |         |           |         |
| *381.3328                                           | 0.08153              | 10.68                  |                  | *381.3138                                    | 1098      | 11.48   | *381.3159 | 13342     | 11.20   |           |           |         | *381.3266                                                      | 10.79   | *381.3273 | 11.00   |
| 382.3397                                            | 0.0398               | 10.80                  |                  | 382.3255                                     | 906       | 11.69   | 382.3328  | 7426      | 11.07   |           |           |         | 382.3340                                                       | 10.77   | 382.3319  | 11.21   |
|                                                     |                      |                        |                  | 383.3272                                     | 3248      | 11.71   | 383.3342  | 4302      | 11.20   |           |           |         | 383.3567                                                       | 11.62   | 383.3497  | 11.78   |
|                                                     |                      |                        |                  | 384.3326                                     | 1615      | 11.86   | 384.3433  | 3929      | 11.47   |           |           |         |                                                                |         |           |         |
|                                                     |                      |                        |                  | 385.3326                                     | 2458      | 11.69   |           |           |         |           |           |         |                                                                |         |           |         |
| 388.3957                                            | 0.04975              | 13.18                  | 7dh and chol     | 388.3934                                     | 931       | 13.26   |           |           |         | 388.3950  | 1023      | 13.19   |                                                                |         |           |         |
| 389.3983                                            | 0.03727              | 13.17                  | 7dh and chol     |                                              |           |         |           |           |         |           |           |         |                                                                |         |           |         |

\*cholcal: Cholecalciferol, vitamin D<sub>3</sub>; 7dh: 7-dehydrocholesterol (7-DHC); chol: Cholesterol. Representative mass for 7-DHC, cholesterol and vitamin D<sub>3</sub> are highlighted and marked as \*, # and ^, respectively.

## References

31. Hilger, J. et al. A systematic review of vitamin D status in populations worldwide. *Br. J. Nutr.* **111**, 23–45 (2014).
32. Schleicher, R. L. et al. National estimates of serum total 25-hydroxyvitamin D and metabolite concentrations measured by liquid chromatography–tandem mass spectrometry in the US population during 2007–2010. *J. Nutr.* **146**, 1051–1061 (2016).
33. Sarafin, K. et al. Standardizing 25-hydroxyvitamin D values from the Canadian Health Measures Survey. *Am. J. Clin. Nutr.* **102**, 1044–1050 (2015).
34. Cashman, K. D. et al. Vitamin D deficiency in Europe: pandemic? *Am. J. Clin. Nutr.* **103**, 1033–1044 (2016).
35. Ministry of Public Health, UNICEF, Aga Khan University. *National Nutrition Survey, Afghanistan* (2013).
36. Liu, W. et al. Vitamin D status in mainland of China: a systematic review and meta-analysis. *EClinicalMedicine* **38**, 101017 (2021).
37. Nakamura, K. et al. Impact of demographic, environmental, and lifestyle factors on vitamin D sufficiency in 9084 Japanese adults. *Bone* **74**, 10–17 (2015).
38. Cashman, K. D., Sheehy, T. & O'Neill, C. M. Is vitamin D deficiency a public health concern for low middle income countries? A systematic literature review. *Eur. J. Nutr.* **58**, 433–453 (2019).
39. Siddiquee, M. H., Bhattacharjee, B., Siddiqi, U. R. & MeshbahurRahman, M. High prevalence of vitamin D deficiency among the South Asian adults: a systematic review and meta-analysis. *BMC Public Health* **21**, 1823 (2021).
40. Arabi, A., El Rassi, R. & El-Hajj Fuleihan, G. Hypovitaminosis D in developing countries—prevalence, risk factors and outcomes. *Nat. Rev. Endocrinol.* **6**, 550–561 (2010).
41. Mogire, R. M. et al. Prevalence of vitamin D deficiency in Africa: a systematic review and meta-analysis. *Lancet Glob. Health* **8**, e134–e142 (2020).
42. Sayed-Hassan, R., Abazid, N. & Alourfi, Z. Relationship between 25-hydroxyvitamin D concentrations, serum calcium, and parathyroid hormone in apparently healthy Syrian people. *Arch. Osteoporos.* **9**, 176 (2014).
